# Supplementary material for: High-Fat Diet Impairs Muscle Function and Increases the Risk of Environmental Heatstroke in Mice
Source: MDPI journal article supplement (doi:10.3390/ijms23095286), 2022-05-09
Supplement: s1 [file s1]

## SUPPLEMENTAL MATERIAL

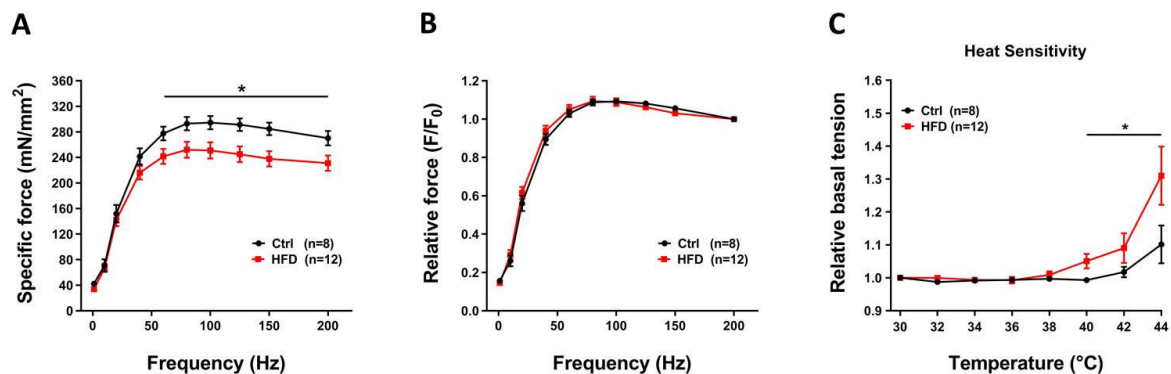

**Figure S1.** In-vitro specific force and temperature dependence of basal tension in Soleus muscles. (A and B) Force frequency (1-200Hz) curve of specific force (panel A) and relative force normalized to 200Hz (panel B) in isolated Soleus muscles. (C) Relative basal tension (normalized to 30°C) during exposure to increasing temperature (from 30 to 44°C). Data are shown as mean  $\pm$  SEM (\* $p < 0.05$ ), as evaluated two-way ANOVA followed by Tukey's post-hoc test. n = number of Soleus muscles tested.

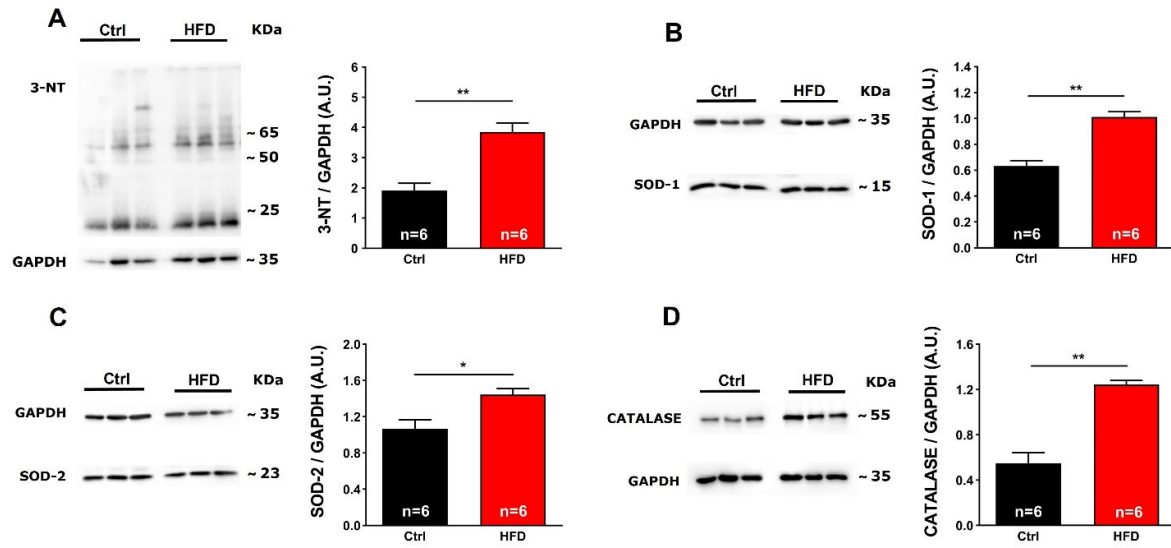

**Figure S2.** Markers of oxidative and nitrosilative stress in Soleus muscles. Representative immunoblots (left) and relative band densities normalized to GAPDH levels (right) of 3-NT (panel **A**), SOD-1 (panel **B**), SOD-2 (panel **C**), and Catalase (panel **D**) in Soleus muscle homogenates. Data are shown as mean  $\pm$  SEM (\* $p$ <0.05 and \*\* $p$ <0.01), as evaluated by two-tailed unpaired Student's  $t$ -test.  $n$  = number of mice tested.

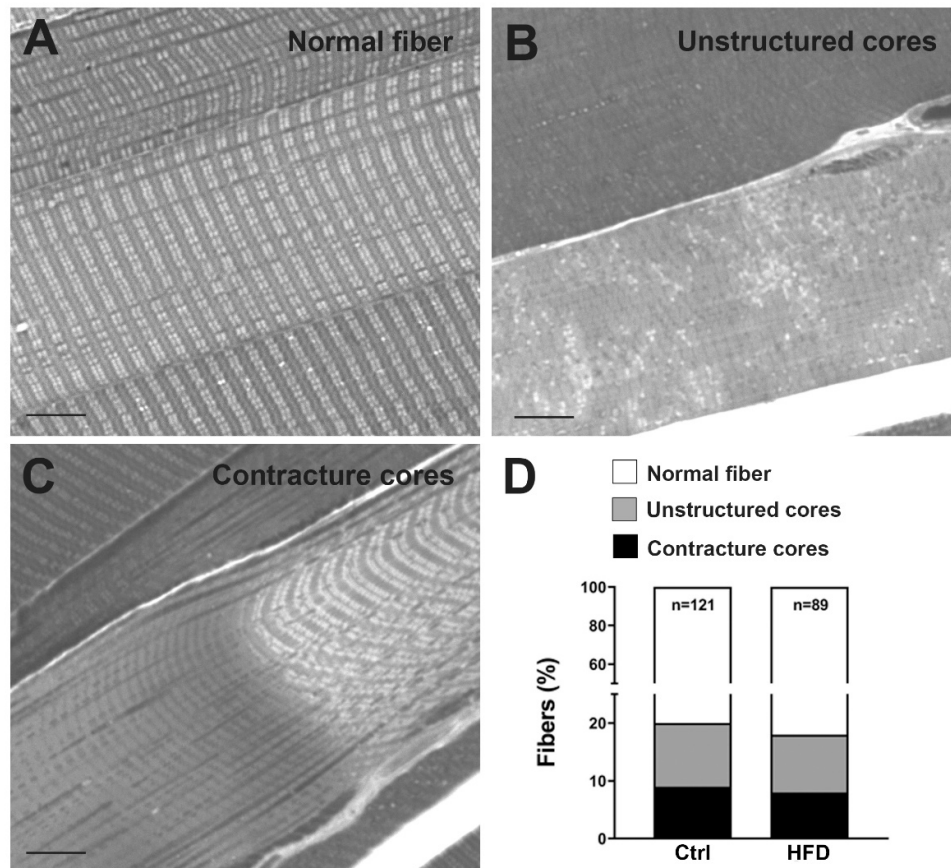

**Figure S3.** Muscle damage after the heat stress protocol evaluated by histological analysis. Quantitative analysis (panel **D**) in histological sections of EDL fibers, which were classified in three groups: presenting normal appearance (as in panel **A**), containing areas with loss of striation (as in panel **B**), or finally containing contracture cores (as in panel **C**). n = number of EDL fibers analyzed.

**Table S1.** Energetic and nutrients composition of the diets administrated to Ctrl and HFD mice.

| <b>(Ctrl Diet)</b> |                 |                |
|--------------------|-----------------|----------------|
| Metabolized energy |                 |                |
| Content            | Value (Kcal/Kg) | Percentage (%) |
| Fat                | 3.780           | 70             |
| Protein            | 842             | 16             |
| Carbonhydrates     | 766             | 14             |

| Crude nutrients and moisture |               |                |
|------------------------------|---------------|----------------|
| Content                      | Value (mg/Kg) | Percentage (%) |
| Moisture                     | 44.328        | 4.4            |
| Crude Ash                    | 61.481        | 6.1            |
| Crude Fibre                  | 47.350        | 4.7            |
| Crude Fat                    | 420.018       | 42.0           |
| Crude Protein                | 210.545       | 21.1           |
| Nitrogenfree Extractives     | 216.278       | 21.7           |

| <b>(HF Diet)</b>   |                 |                |
|--------------------|-----------------|----------------|
| Metabolized energy |                 |                |
| Content            | Value (Kcal/Kg) | Percentage (%) |
| Fat                | 358             | 10             |
| Protein            | 828             | 24             |
| Carbonhydrates     | 2.329           | 66             |

| Crude nutrients and moisture |               |                |
|------------------------------|---------------|----------------|
| Content                      | Value (mg/Kg) | Percentage (%) |
| Moisture                     | 79.090        | 7.9            |
| Crude Ash                    | 43274         | 4.3            |
| Crude Fibre                  | 30.829        | 3.1            |
| Crude Fat                    | 39.725        | 4.0            |
| Crude Protein                | 206.900       | 20.7           |
| Nitrogenfree Extractives     | 600.183       | 60             |

**Table S2.** Manufacturer and catalogue number by material reagent used.

| <b>CHEMICAL/REAGENT</b>                                              | <b>MANUFACTURER</b>                 | <b>CATALOGUE NUMBER</b> |
|----------------------------------------------------------------------|-------------------------------------|-------------------------|
| 2-mercaptoethanol                                                    | Sigma-Aldrich, USA                  | M3148                   |
| Anti-3-NT primary antibody                                           | Merck Millipore, Italy              | 05-233                  |
| Anti-Catalase primary antibody                                       | Santa Cruz Biotechnology Inc., USA  | SC-271803               |
| Anti-GAPDH primary antibody                                          | OriGene Technologies Inc., USA      | TA802519                |
| Anti-SOD1 primary antibody                                           | Santa Cruz Biotechnology Inc., USA  | SC-11407                |
| Anti-SOD2 primary antibody                                           | Santa Cruz Biotechnology, Inc., USA | SC-30080                |
| BCA quantification kit                                               | ThermoFisher scientific, USA        | 23225                   |
| CaCl <sub>2</sub>                                                    | Sigma-Aldrich, USA                  | C8106                   |
| Caffeine                                                             | Sigma-Aldrich, USA                  | C0750                   |
| Calcium colorimetric assay kit                                       | Sigma-Aldrich, USA                  | MAK022                  |
| Creatine Kinase colorimetric assay kit                               | Sigma-Aldrich, USA                  | MAK116-1KT              |
| DPX mounting medium for histology                                    | Sigma-Aldrich, USA                  | 06522                   |
| EDTA                                                                 | Sigma-Aldrich, USA                  | ED2SS                   |
| Enhanced chemiluminescent liquid                                     | Perkin-Elmer, USA                   | NEL104001EA             |
| Epoxy resin (Epon 812)                                               | Electron Microscopy Sciences, USA   | 14120                   |
| Glucose                                                              | Sigma-Aldrich, USA                  | G8270                   |
| Glutaraldehyde                                                       | Histo-line Laboratories, Italy      | 18428-10                |
| HEPES                                                                | Sigma-Aldrich, USA                  | H3375                   |
| Horseradish peroxidase conjugated secondary antibodies (anti-mouse)  | Merck Millipore, USA                | 401253                  |
| Horseradish peroxidase conjugated secondary antibodies (anti-rabbit) | Merck Millipore, USA                | 401393                  |
| KCl                                                                  | Sigma-Aldrich, USA                  | P9333                   |
| MgSO <sub>4</sub>                                                    | Sigma-Aldrich, USA                  | M7506                   |
| NaCaCO                                                               | Electron microscopy sciences, USA   | 12300                   |
| NaCl                                                                 | Sigma-Aldrich, USA                  | S7653                   |
| NaH <sub>2</sub> PO <sub>4</sub>                                     | Sigma-Aldrich, USA                  | 71505                   |
| Non-fat dry milk                                                     | EuroClone, Italy                    | APA08300500             |
| OsO <sub>4</sub>                                                     | Electron microscopy sciences, USA   | 19151                   |
| Potassium turbidimetric assay kit                                    | MyBioSource, USA                    | MBS2540590              |
| Protease inhibitors cocktail                                         | Roche, Germany                      | 11836153001             |
| SDS                                                                  | Bio-Rad, USA                        | 1610301                 |
| Sodium Borate Tetra                                                  | Electron microscopy sciences, USA   | 21130                   |
| Sodium Deoxycholate                                                  | Sigma-Aldrich, USA                  | D6750                   |
| Toluidine blue O                                                     | Electron microscopy sciences, USA   | 22050                   |
| TRIS HCl                                                             | Sigma-Aldrich, USA                  | T3253                   |
| Triton-X                                                             | Sigma-Aldrich, USA                  | T8787                   |
| Tween 20                                                             | Sigma-Aldrich, USA                  | P1379                   |
